# Supplementary material for: Identification of Short-Chain Fatty Acids for Predicting Preterm Birth in Cervicovaginal Fluid Using Mass Spectrometry
Source: MDPI journal article supplement (doi:10.3390/ijms25063396), 2024-03-17
Supplement: s1 [file s1]

# Supplementary Materials: Identification of Short-Chain Fatty Acids for Predicting Preterm Birth in Cervicovaginal Fluid Using Mass Spectrometry

Young-Min Hur <sup>1,†</sup>, Eun-Jin Kwon <sup>2,†</sup>, Young-Ah You <sup>1</sup>, Sunwha Park <sup>1</sup>, Soo-Min Kim <sup>1</sup>, Gain Lee <sup>1</sup>, Yoon-Young Go <sup>1</sup> and Young-Ju Kim <sup>1,\*</sup>

<sup>1</sup> Department of Obstetrics and Gynecology, Ewha Medical Research Institute, College of Medicine, Ewha Womans University, Seoul 07984, Republic of Korea; hym1210@ewha.ac.kr (Y.-M.H.); yayou@ewha.ac.kr (Y.-A.Y.); clarrissa15@gmail.com (S.P.); zeus\_0218@ewhain.net (S.-M.K.); loveleee0102@gmail.com (G.L.); gokogoko@ewha.ac.kr (Y.-Y.G.)

<sup>2</sup> Division of Allergy and Respiratory Disease Research, Department of Chronic Disease Convergence Research, Korea National Institute of Health, Cheongju-si 28159, Republic of Korea; friendkej1004@hanmail.net

\* Correspondence: kkyj@ewha.ac.kr

† These authors contributed equally to this work.

**Table S1. Clinical characteristics of the subgroup of PTB**

|                                        | TB (n=60)          | PTB < 2 days<br>(n=19) | PTB ≥ 2 days<br>(n=10) |          |
|----------------------------------------|--------------------|------------------------|------------------------|----------|
|                                        | Mean ± SD or N (%) | Mean ± SD or N (%)     | Mean ± SD or N (%)     | <i>P</i> |
| Maternal age (years)                   | 33.1 ± 3.9         | 31.3 ± 4.0             | 32.6 ± 4.4             | 0.23     |
| Pre-pregnancy BMI (kg/m <sup>2</sup> ) | 21.4 ± 2.5         | 22.5 ± 3.2             | 21.8 ± 2.8             | 0.18     |
| Nulliparity                            | 39 (65.0)          | 11 (57.9)              | 3 (37.5)               | 0.31     |
| History of prior PTB                   | 2 (3.3)            | 2 (10.5)               | 1 (10.0)               | 0.40     |
| Cervical length (mm)                   | 29.1 ± 7.2         | 22.5 ± 9.0             | 26.6 ± 8.4             | 0.09     |
| Fetal fibronectin                      |                    |                        |                        |          |
| Positive                               | 1 (16.7)           | 11 (91.7)              | 1 (33.3)               | 0.01     |
| Negative                               | 5 (83.3)           | 1 (8.3)                | 2 (66.7)               |          |
| White blood cell (cell/mL)             | 8.8 ± 2.1          | 10.8 ± 2.9             | 10.2 ± 3.3             | 0.03     |
| C-reactive protein (mg/L)              | 0.2 ± 0.2          | 0.9 ± 1.3              | 0.8 ± 0.9              | 0.003    |
| Gestational age at birth (weeks)       | 38.7 ± 0.9         | 32.3 ± 3.8             | 34.0 ± 3.5             | <0.001   |

Kruskal–Wallis test was used for the statistical analysis. Continuous data are presented as means ± standard deviations, and categorical data are presented as N (%).

TB, term birth; PTB, preterm birth; BMI, body mass index.

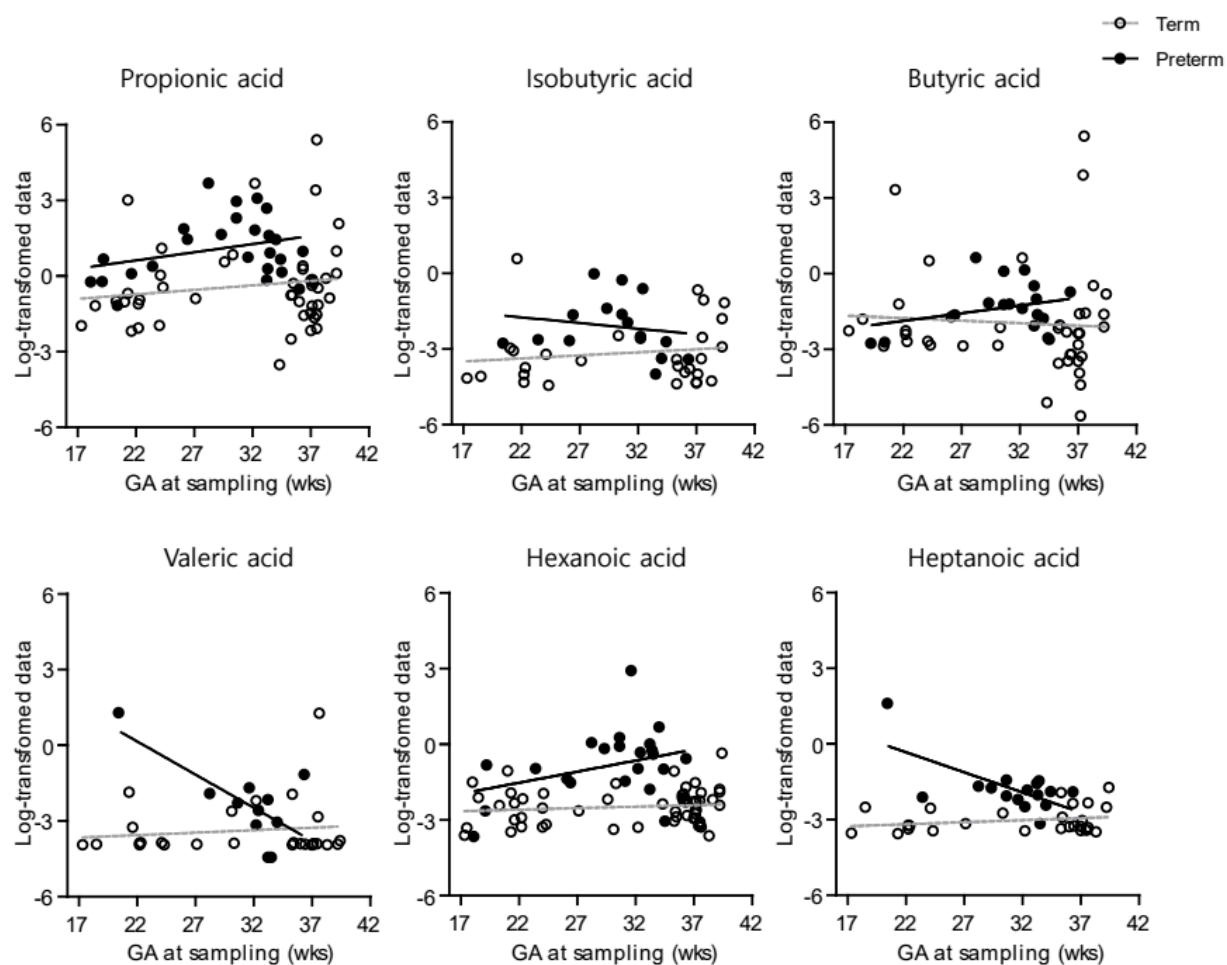

**Figure S1.** Concentration of SCFAs in CVP samples from second to third trimester of pregnancy  
GA, gestational age; SCFAs, short chain fatty acids; CVP, cervicovaginal fluid

**Table S2. Quantitative results of SCFAs in clinical sample**

| Patient No. | (Unit: µg/mL) |                |                 |              |              |               |                |
|-------------|---------------|----------------|-----------------|--------------|--------------|---------------|----------------|
|             | Acetic acid   | Propionic acid | Isobutyric acid | Butyric acid | Valeric acid | Hexanoic acid | Heptanoic acid |
| 1           | N.D.          | 0.883          | N.D.            | 0.143        | BLOQ         | 0.132         | N.D.           |
| 2           | N.D.          | 0.895          | N.D.            | N.D.         | N.D.         | 0.149         | N.D.           |
| 3           | N.D.          | 0.836          | N.D.            | 0.047        | N.D.         | 0.164         | N.D.           |
| 4           | 3.003         | 0.767          | N.D.            | 0.065        | N.D.         | 0.162         | N.D.           |
| 5           | N.D.          | 0.819          | N.D.            | BLOQ         | BLOQ         | 0.136         | N.D.           |
| 6           | 20.037        | 0.223          | 0.049           | 0.193        | 0.065        | 0.206         | 0.104          |
| 7           | 1.64          | N.D.           | N.D.            | 0.091        | N.D.         | 0.255         | N.D.           |
| 8           | N.D.          | 1.316          | N.D.            | 0.108        | N.D.         | 0.219         | N.D.           |
| 9           | 40.196        | 10.585         | 0.096           | 14.971       | 0.067        | 0.106         | 0.095          |
| 10          | 42.765        | 0.452          | 0.481           | 0.34         | 2.405        | 0.103         | 0.101          |
| 11          | N.D.          | N.D.           | N.D.            | N.D.         | N.D.         | 0.187         | N.D.           |
| 12          | 18.737        | 0.256          | 0.056           | 0.208        | 0.065        | 0.082         | 0.086          |
| 13          | 0.538         | 0.489          | 0.128           | N.D.         | N.D.         | 0.481         | N.D.           |
| 14          | N.D.          | N.D.           | N.D.            | N.D.         | N.D.         | N.D.          | N.D.           |
| 15          | 33.235        | 0.239          | 0.05            | 0.188        | 0.065        | 0.133         | 0.097          |
| 16          | 4.997         | 0.5            | N.D.            | 0.136        | N.D.         | 0.185         | N.D.           |
| 17          | 0.404         | 0.177          | 0.048           | 0.085        | 0.065        | 0.121         | 0.098          |
| 18          | 42.006        | 0.442          | 0.059           | 0.286        | 0.066        | 0.231         | 0.175          |
| 19          | 95.002        | 42.284         | 0.172           | 43.828       | 0.141        | 0.112         | 0.094          |
| 20          | 13.229        | 0.316          | N.D.            | 0.103        | N.D.         | N.D.          | N.D.           |
| 21          | 18.016        | 2.15           | N.D.            | 1.42         | N.D.         | N.D.          | N.D.           |
| 22          | 19.84         | 0.94           | 0.052           | 0.716        | 0.065        | 0.081         | 0.089          |
| 23          | N.D.          | 0.236          | N.D.            | N.D.         | N.D.         | 0.211         | N.D.           |
| 24          | 47.404        | 0.463          | 0.062           | 0.207        | 0.068        | 0.104         | 0.107          |
| 25          | N.D.          | N.D.           | N.D.            | N.D.         | N.D.         | 0.208         | N.D.           |
| 26          | 4.898         | N.D.           | N.D.            | N.D.         | N.D.         | 0.353         | N.D.           |
| 27          | 17.361        | N.D.           | N.D.            | N.D.         | N.D.         | N.D.          | N.D.           |
| 28          | 44.25         | 0.591          | 0.094           | 0.223        | 0.26         | 0.475         | 0.263          |
| 29          | 11.815        | 0.906          | 0.632           | 0.33         | N.D.         | 0.349         | N.D.           |
| 30          | 27.207        | 1.107          | N.D.            | 0.164        | N.D.         | 0.121         | N.D.           |
| 31          | 21.537        | 0.897          | N.D.            | 0.238        | 0.046        | 0.289         | N.D.           |
| 32          | N.D.          | 1.595          | N.D.            | 0.148        | BLOQ         | 0.566         | N.D.           |
| 33          | 1.871         | 0.86           | N.D.            | BLOQ         | BLOQ         | 0.16          | N.D.           |
| 34          | N.D.          | 1.668          | BLOQ            | BLOQ         | 0.311        | 7.551         | 0.217          |
| 35          | 0.653         | 0.852          | N.D.            | BLOQ         | N.D.         | 0.079         | N.D.           |
| 36          | 23.914        | 6.387          | BLOQ            | 0.712        | 0.225        | 1.007         | 0.34           |

|    |        |        |       |       |       |        |       |
|----|--------|--------|-------|-------|-------|--------|-------|
| 37 | 2.617  | 2.717  | 0.097 | 0.292 | 0.121 | 1.601  | 0.185 |
| 38 | 4.143  | 3.533  | 0.177 | 0.384 | 0.112 | 0.512  | 0.178 |
| 39 | N.D.   | 1.885  | 0.063 | 0.324 | 0.046 | 0.758  | 0.112 |
| 40 | 31.742 | 8.438  | 0.655 | 1.1   | 0.167 | 0.794  | 0.281 |
| 41 | N.D.   | N.D.   | N.D.  | N.D.  | N.D.  | N.D.   | N.D.  |
| 42 | 53.543 | 12.777 | 0.989 | 1.548 | 0.266 | 1.042  | 0.313 |
| 43 | 12.472 | N.D.   | 0.259 | 0.431 | N.D.  | 0.363  | N.D.  |
| 44 | N.D.   | 0.444  | 0.147 | 0.152 | 2.449 | 54.362 | 3.055 |
| 45 | N.D.   | N.D.   | N.D.  | N.D.  | N.D.  | N.D.   | N.D.  |
| 46 | N.D.   | N.D.   | N.D.  | N.D.  | N.D.  | N.D.   | N.D.  |
| 47 | 7.061  | 1.968  | 0.095 | 0.601 | 0.448 | 0.673  | 0.268 |
| 48 | 6.129  | 1.326  | N.D.  | 0.084 | 0.125 | 0.426  | 0.191 |
| 49 | 21.753 | 4.934  | 0.322 | 0.427 | 0.204 | 0.946  | 0.239 |
| 50 | 9.961  | 1.581  | 0.153 | 0.171 | N.D.  | 0.502  | 0.269 |
| 51 | 16.629 | 2.731  | 0.318 | 0.321 | N.D.  | 0.348  | N.D.  |
| 52 | 3.172  | 0.698  | N.D.  | N.D.  | N.D.  | 0.23   | N.D.  |
| 53 | 4.515  | 1.21   | N.D.  | N.D.  | N.D.  | N.D.   | 0.246 |
| 54 | 21.768 | 3.062  | BLOQ  | 0.495 | N.D.  | 0.849  | 0.363 |
| 55 | 6.5    | 1.312  | 0.161 | N.D.  | N.D.  | 0.512  | 0.231 |
| 56 | 25.606 | 3.135  | 0.382 | 0.445 | N.D.  | 0.891  | 0.298 |
| 57 | 59.134 | 7.808  | 0.835 | 1.067 | N.D.  | 1.198  | 0.371 |
| 58 | 3.637  | 1.063  | N.D.  | N.D.  | N.D.  | N.D.   | N.D.  |
| 59 | 16.32  | 3.666  | 0.157 | 0.303 | N.D.  | 0.387  | N.D.  |
| 60 | 5.158  | N.D.   | N.D.  | N.D.  | N.D.  | N.D.   | N.D.  |
| 61 | 1.886  | N.D.   | N.D.  | 0.02  | N.D.  | 0.207  | N.D.  |
| 62 | 22.74  | 0.437  | 0.063 | 0.194 | 0.067 | 0.131  | 0.122 |
| 63 | 2.864  | 0.087  | N.D.  | 0.029 | N.D.  | 0.194  | N.D.  |
| 64 | 44.354 | 0.594  | 0.078 | 0.243 | 0.069 | 0.157  | 0.133 |
| 65 | 47.477 | 0.492  | 0.066 | 0.2   | 0.067 | 0.249  | 0.103 |
| 66 | 3.002  | 1.205  | N.D.  | N.D.  | N.D.  | 0.308  | 0.195 |
| 67 | 15.514 | 0.257  | N.D.  | N.D.  | N.D.  | 0.173  | N.D.  |
| 68 | N.D.   | 0.618  | N.D.  | N.D.  | N.D.  | 0.263  | N.D.  |
| 69 | 40.031 | 0.516  | 0.075 | 0.155 | 0.069 | 0.224  | 0.105 |
| 70 | 3.926  | N.D.   | N.D.  | N.D.  | N.D.  | 0.205  | N.D.  |
| 71 | 7.608  | 1.476  | N.D.  | N.D.  | N.D.  | 0.221  | N.D.  |
| 72 | 15.911 | 8.056  | 0.119 | 10.01 | 0.276 | 0.09   | 0.085 |
| 73 | 3.656  | N.D.   | N.D.  | N.D.  | N.D.  | 0.125  | N.D.  |
| 74 | 2.992  | 0.717  | N.D.  | N.D.  | N.D.  | 0.265  | 0.197 |
| 75 | 1.388  | N.D.   | N.D.  | 0.14  | 0.164 | 0.097  | N.D.  |
| 76 | 3.783  | 1.021  | 0.108 | 0.156 | 0.069 | 0.259  | 0.171 |

|    |        |        |       |       |       |       |       |
|----|--------|--------|-------|-------|-------|-------|-------|
| 77 | N.D.   | N.D.   | N.D.  | N.D.  | N.D.  | 0.101 | N.D.  |
| 78 | 16.835 | 1.986  | 0.288 | 0.325 | N.D.  | 0.269 | N.D.  |
| 79 | N.D.   | 0.346  | N.D.  | N.D.  | N.D.  | 0.118 | N.D.  |
| 80 | N.D.   | BLOQ   | N.D.  | N.D.  | N.D.  | 0.103 | N.D.  |
| 81 | 3.37   | 0.731  | 0.046 | 0.141 | 0.065 | 0.11  | 0.092 |
| 82 | 3.844  | 1.075  | 0.132 | 0.232 | 0.066 | 0.289 | 0.176 |
| 83 | 1.989  | 0.538  | 0.091 | 0.137 | 0.066 | 0.16  | 0.112 |
| 84 | 14.877 | 4.211  | 0.444 | 0.571 | 0.073 | 0.781 | 0.302 |
| 85 | 51.123 | 12.697 | 0.167 | 1.535 | 0.219 | 0.102 | 0.092 |
| 86 | N.D.   | 0.547  | N.D.  | N.D.  | N.D.  | 0.219 | N.D.  |
| 87 | 7.338  | 1.787  | 0.181 | 0.229 | 0.068 | 0.342 | 0.15  |
| 88 | 0.982  | 0.364  | 0.05  | 0.09  | 0.065 | 0.129 | 0.093 |
| 89 | 1.178  | 0.34   | 0.073 | 0.109 | 0.066 | 0.142 | 0.105 |
